# Supplementary material for: The effect of high dielectric BaTiO3 nanoparticle dimensions on the dielectric properties and electro-optical performance of polymer dispersed liquid crystal films
Source: Royal Society of Chemistry journal article supplement (doi:10.1039/d4tc00936c), 2024-01-01
Supplement: d4tc00936c1.pdf [file d4tc00936c1.pdf]

## Supplementary material

Effect of high dielectric BaTiO<sub>3</sub> nanoparticle dimensions on dielectric, electro-optical performance of polymer dispersed liquid crystal films

Wei Wu<sup>1,2</sup>, Xiaohui Sun<sup>1,2</sup>, Dong Wang<sup>1,2</sup>, Haining Qian<sup>1,2</sup>, Bo Wang<sup>1,2</sup>, Xiangwei Wang<sup>1,2</sup>, Xianhui Rong<sup>1,2\*</sup>, Xuyang Zhang<sup>1,2\*</sup>, Guohua Wu<sup>1,2\*</sup>

<sup>1</sup> *College of Materials Science and Chemical Engineering, Harbin Engineering University, Harbin, 150001, Heilongjiang China*

<sup>2</sup> *Qingdao Innovation and Development Center, Harbin Engineering University, Qingdao 266500, Shandong, China*

\* *Corresponding author:*

*E-mail:* ghwu@hrbeu.edu.cn(Guohua Wu)

*E-mail:* xuyangz@hrbeu.edu.cn(Xuyang Zhang)

*E-mail:* rongxianhui63@163.com(Xianhui Rong)

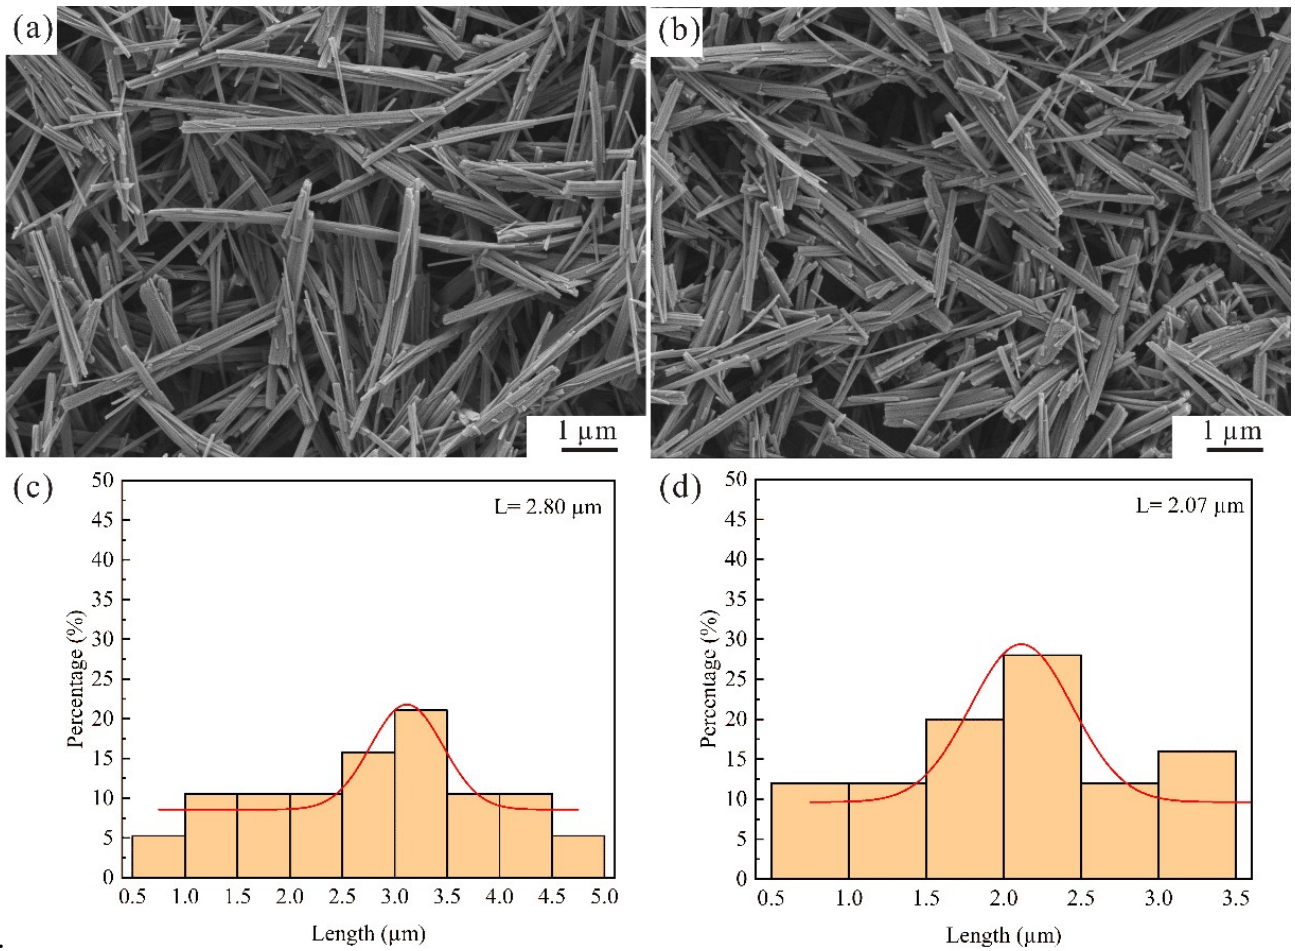

Fig. S1 SEM images of (a) 1-BTO before ultrasonic agitation, (b) 1-BTO after ultrasonic agitation for 1 h. Corresponding length distribution of (c) 1-BTO before ultrasonic agitation, (d) 1-BTO after ultrasonic agitation for 1 h.

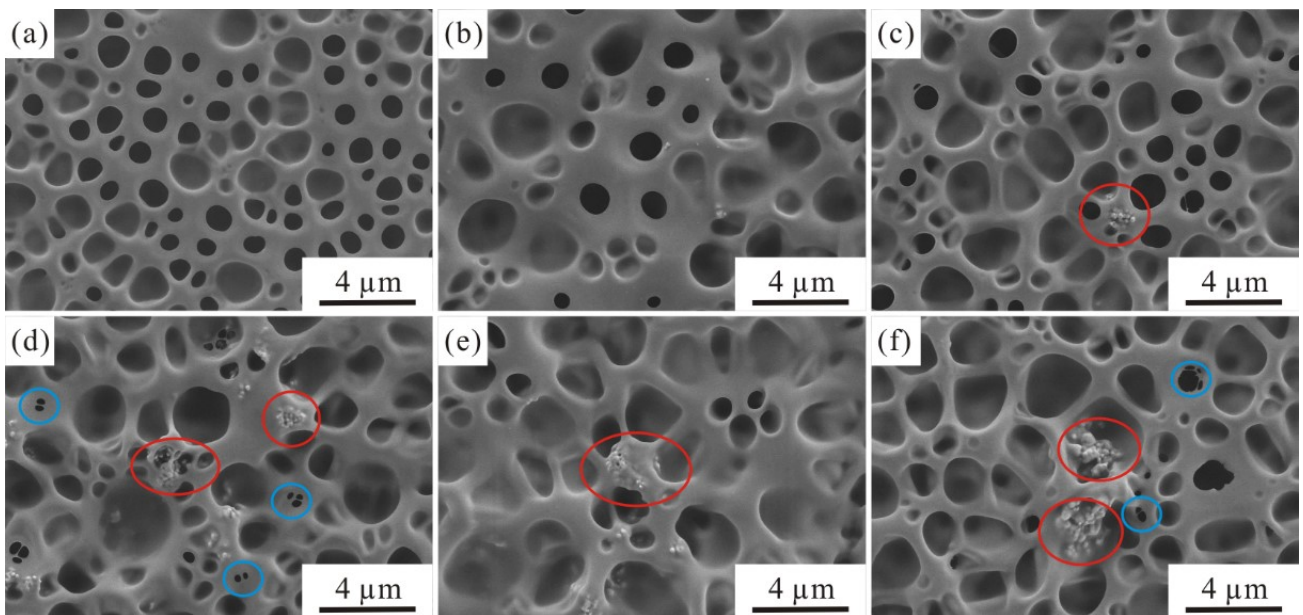

Fig. S2 SEM images of the (a) pure PDLC film, (b) 0-BTO-1 film, (c) 0-BTO-2 film, (d) 0-BTO-3 film, (e) 0-BTO-4 film and (f) 0-BTO-5 film.

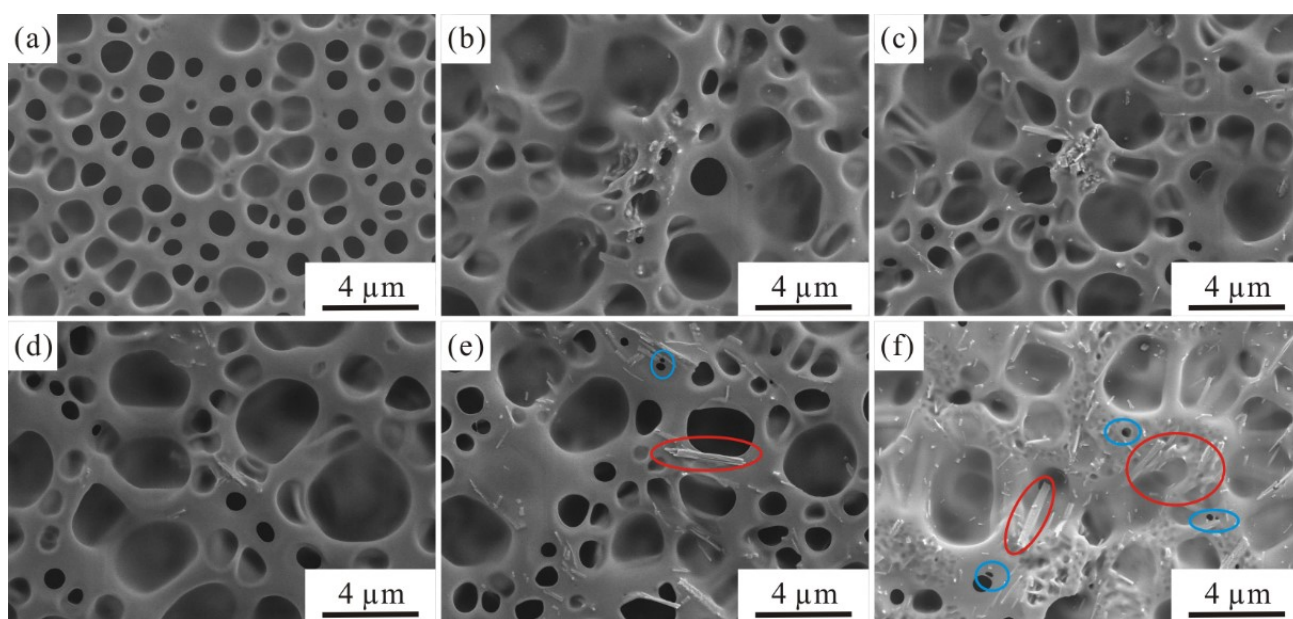

Fig. S3 SEM images of the (a) pure PDLC film, (b) 1-BTO-1 film, (c) 1-BTO-2 film, (d) 1-BTO-3 film, (e) 1-BTO-4 film and (f) 1-BTO-5 film.

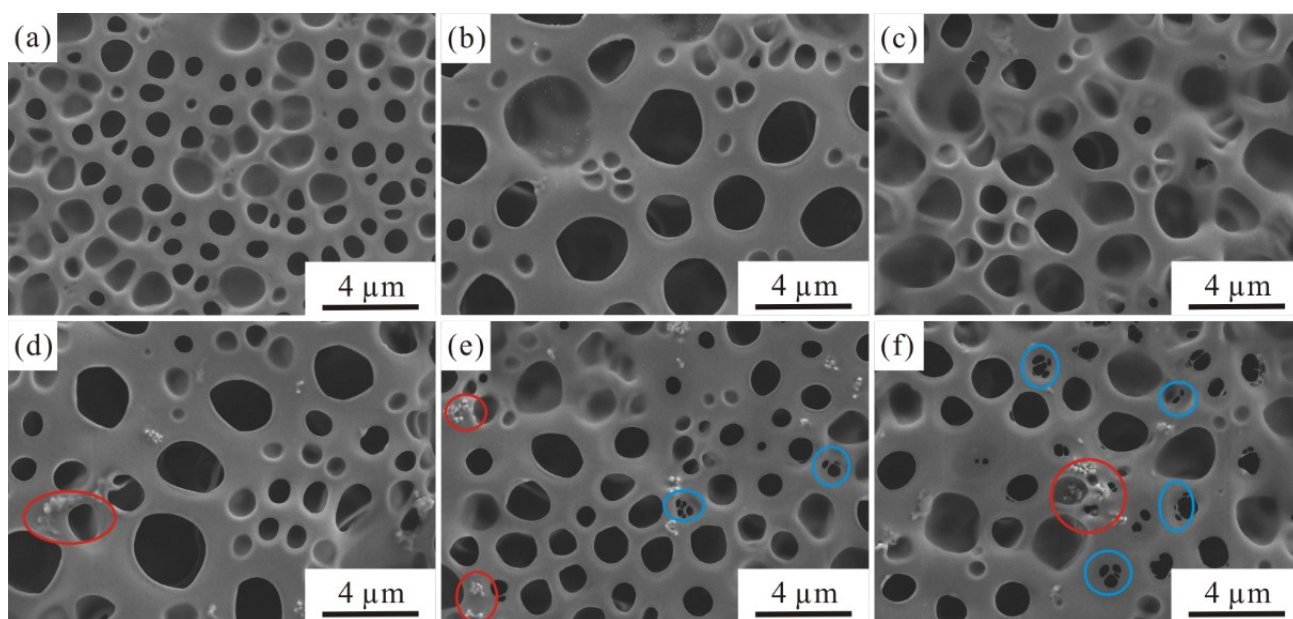

Fig. S4 SEM images of the (a) pure PDLC film, (b) 2-BTO-1 film, (c) 2-BTO-2 film, (d) 2-BTO-3 film, (e) 2-BTO-4 film and (f) 2-BTO-5 film.
